# Supplementary material for: Physicians’ perspectives regarding pragmatic clinical trials
Source: Atypon-hosted journal article supplement (doi:10.2217/cer-2016-0024), 2016-07-15
Supplement: suppl_data.docx [file suppl_data.docx]

**Supplementary Materials: Interview Guide**

**In Depth Interview Guide**

**BACKGROUND [5 minutes]**

1. Let me get started by asking you a bit about yourself.
   1. Would you briefly describe your professional experience and current position?
   2. Would you describe your work setting and the patient populations you work with?
2. As a physician, what is your role, if any, in research? We are interested both in any research experience from the past as well as any current experiences or roles.
   1. Probes:
      - 1. Experience with research conducted in the context of usual medical practice?
        2. Multi-center research?
        3. Clinical trials?
        4. Observational research?
        5. Are you *currently* involved with any of the types you have mentioned?

**EXAMPLES/SCENARIOS [30-35 minutes]**

1. As I said earlier, we are interested in the type of research that is conducted in the context of usual health care practices/encounters.
2. Today I want to talk to you about two different categories of this kind of research, and I’ll use an example for each to help our discussion.
3. We’re interested in hearing your opinions, as a physician, about the ethical and regulatory challenges, if any, that might accompany this type of research.

***[Note: in this section, please emphasize the distinction between* ethical *challenges/questions and* regulatory *concerns/questions]***

**CATEGORY 1 – COMPARATIVE EFFECTIVENESS [10-12 minutes]**

1. Let’s talk about research in which two or more approved and widely used drugs/therapies/interventions are compared to determine which one is best.
2. Outpatient: For example, imagine a study comparing two drugs designed to treat urinary tract infections.

Hospitalist: For example, imagine a study comparing two anticoagulants used to treat patients with deep-vein thrombosis.

- 1. Assume that both of the drugs have been approved by the FDA
  2. Both are considered safe and effective
  3. Both are routinely prescribed to patients, but it is unknown if one is better than the other

1. Outpatient: In this study,
   1. Patients seeking care for urinary tract infections would be randomly assigned to receive one of the two drugs
   2. If there was reason to believe one of the drugs could be contraindicated for a patient, he/she would be excluded from the study.
   3. Patients’ outcomes would be tracked in an effort to determine which drug is more effective.

Hospitalist: In this study,

1. Patients seeking care for deep-vein thrombosis would be randomly assigned to receive one of the two drugs
2. Their outcomes would be tracked in an effort to determine which drug is more effective.
3. Are you familiar with studies of this sort?

**[If involved with a study]**

1. Please tell me briefly about it.

- 1. Okay, what was your role?

**(If PI/researcher, see appendix at back of guide)**

- 1. How did it go from your point of view?

PROMPTS:

- - 1. How did you talk to your patients about this study?
    2. How did they react?
    3. Were you comfortable explaining the study (e.g., that you didn’t know which drug worked best)?
    4. Did this study use a consent process? Can you describe it? How well/not do you think it worked?

**[ALL]**

- - - 1. How do you think this type of study compares to traditional clinical trials?
         1. How do you perceive the risks/burdens to patients?
         2. To physicians?

Probes: liability, time, workflow, consent if physician is being asked to obtain consent for a study they did not design

1. How do you view a study like this in comparison to everyday clinical care?
   1. Risks/burdens to patients
   2. Burdens to physicians
2. What, if any, are the ethical obligations to do this type of research:
   1. Of institutions?
   2. Of clinicians?
   3. Of patients?
   4. PROBES: What would get in the way of meeting that obligation? What are potential competing or overriding factors? How do you think this plays out in practice?

*DOMAIN 1. Clinician – Patient – Clinician Relationships.*

1. How would you say this study compares to prescribing a drug for a UTI ordinarily, without a study in place? Do you think it would end up being fairly similar or different from what otherwise would have happened?
   1. Can you describe how this study might or might not affect your relationship with your patients?

PROMPTS:

- - 1. How do you think your patients would respond to this type of study?
    2. Can you explain how you might discuss this study with your patients?
    3. Would you be comfortable doing so?
    4. If not, what would be needed to make you more comfortable?
  1. Can you describe how it would look to incorporate this type of study into your workflow?

PROMPTS:

- - 1. What barriers do you imagine?
    2. How might they be overcome?

1. As a clinician, would this type of study raise ethical challenges for you? [In comparison to clinical care]
2. What role, if any, should consent play in this scenario? Do you think this type of study requires consent from patients?
   1. If so:
      1. Why is it important to get consent?
      2. How should it be obtained?
      3. Why this method?
      4. Specifically probe: why or why not *written consent*?
   2. If not:
      1. Why not?
      2. Are there other similar types of studies which you think might require consent? (i.e. comparing two FDA-approved drugs for a more serious condition)
      3. Specifically probe: what about *written consent*?
   3. How do you view the role of informed consent in a study like this in comparison to a traditional clinical trial?

*DOMAIN 2. Clinicians and their Institution*

- - - 1. Now imagine that your department chair or a similar leader wants your department to take part in this study. Assume that there’s consensus in your field that it is unknown if one of the drugs is better than the other. In all cases in which there are no contraindications for a particular patient, you and other physicians in your department will be *expected* to enroll all patients presenting with a [UTI] [DVT].

1. How do you think this might work at your institution?
2. When would you like to be involved in the study process?
   1. PROBES: During the design process? Right before implementation? After it’s over (sharing results?)
3. Are there specific ways you think institutions should engage clinicians?
   1. Can you give me a couple examples (emails, letters, web sites, surveys, panels, etc.)?
      - 1. Now imagine that your department chair or a similar leader wants your department to take part in this study and is asking clinicians if they *want* to join. If approached, would you want to participate?
4. Why or why not?
5. Would you feel like you had to participate?
6. As a clinician, do you think you should have a say in how this study is designed and conducted?
7. To what extent would you like to be involved (or not) in helping design it?
8. Why or why not?
9. When would you like to be told in the study process?
10. Are there specific ways you think institutions should engage clinicians?
    1. Can you give me a couple examples (emails, letters, web sites, surveys, panels, etc.)?

*SECTION CLOSING*

If not already covered:

1. Are there any other issues or challenges you could imagine with this study that we did not discuss?

[Note: try to keep comments on study design, etc. to a minimum; “while there are many possible versions of this study, we want to hear your opinion about this *type* of study”]

**CATEGORY 2 – HEALTH CARE SYSTEM OPERATIONS [10-12 minutes]**

1. Now let’s discuss research that is focused on examining the practices and procedures that are a part of a health care system’s normal functioning.
2. As an example, let’s say that researchers are studying whether [clinics] [hospitals] using one type of hand sanitizing gel have a lower incidence of acquired infections compared to [clinics] [hospitals] using a different hand sanitizing gel. For example, one gel has a moisturizing component and the other does not.
   1. Both products are widely used in many health care settings around the country
   2. But no one has gathered data to see if one is associated with lower infection rates.

[*Note: if participant is concerned about study design details, acknowledge that there are many possible studies similar to this one and that we want their opinion on this* kind *of research, which compares different procedures which take place in a health care system’s everyday functioning.*]

1. In this example, [clinics] [hospitals] as a whole are assigned to one procedure or the other.
   1. At [Clinic A] [Hospital A], hand sanitizing dispensers will be filled with sanitizing Gel A, and at [Clinic B] [Hospital B], all dispensers will be filled with sanitizing Gel B.
2. The researchers would track infection rates and monitor adherence rates to see if one sanitizing gel is better at reducing infection rates.

So now I’m going to ask you the same types of questions I did for the first scenario.

- - 1. Are you familiar with studies of this sort?

**[If involved with a study]**

1. Please tell me briefly about it.

- 1. Okay, what was your role?

**(If PI/researcher, see appendix at back of guide)**

- 1. How did it go from your point of view?

PROMPTS:

- - 1. How, if at all, did you talk to your patients about this study?
    2. How did they react?
    3. Were you comfortable explaining the study (e.g., that you didn’t know which drug worked best)?
    4. Did this study use a consent process? Can you describe it? How well/not do you think it worked?

**[ALL]**

1. How do you think this type of study compares to traditional clinical trials?
   1. How do you perceive the risks/burdens to patients?
   2. To physicians?
      1. Probes: liability, time, workflow, consent if physician is being asked to obtain consent for a study he/she did not design
2. How do you view a study like this in comparison to everyday clinical care?
   1. Risks/burdens to patients
   2. Burdens to physicians
3. What, if any, are the ethical obligations to do this type of research:
   1. Of institutions?
   2. Of clinicians?
   3. Of patients?
   4. PROBES: What would get in the way of meeting that obligation? What are potential competing or overriding factors? How do you think this plays out in practice?

*DOMAIN 1. Clinician – Patient – Clinician Relationships*

- - - 1. How would you say this study compares to usual practices for cleaning hands, without a study in place? Do you think it would end up being fairly similar or different from what otherwise would have happened?

1. Can you describe how this study might or might not affect your relationship with your patients?

PROMPTS:

1. How do you think your patients would respond to this type of study?
2. Can you explain how you might discuss this study with your patients?
3. Would you be comfortable doing so?
4. If not, what would be needed to make you more comfortable?
5. Can you describe how it would look to incorporate this type of study into your workflow?

PROMPTS:

1. What barriers do you imagine?
2. How might they be overcome?

1. As a clinician, would this type of study raise ethical challenges for you? [In comparison to clinical care]
2. What role, if any, should consent play in this scenario? Do you think this type of study requires consent from patients?
   1. If so:
      1. Why is it important to get consent?
      2. How should it be obtained?
      3. Why this method?
      4. Specifically probe: why or why not *written consent*?
   2. If not:
      1. Why not?
      2. Are there other similar types of studies which you think might require consent? (i.e. comparing soap and water v. a sanitizing gel?)
      3. Specifically probe: what about *written consent*?
   3. How do you view the role of informed consent in a study like this in comparison to a traditional clinical trial?
3. Do you think this type of study requires consent from providers? What about other personnel cleaning their hands, such as nurses or housekeeping staff?
   1. If so:
      1. Why is it important to get consent?
      2. How should it be obtained?
      3. Why this method?
      4. Specifically probe: why or why not *written consent*?
   2. If not:
      1. Why not?
      2. Are there other similar types of studies which you think might require consent? (i.e. comparing water and soap to a sanitizing gel)
      3. Specifically probe: what about *written consent*?
   3. How do you view the role of informed consent in a study like this in comparison to a traditional clinical trial?

*DOMAIN 2. Clinicians and their Institution*

1. Let’s imagine that the chief medical officer or a similar leader at your institution is interested in taking part in this study and it will be implemented in your clinic.
2. How do you think this might work at your institution?
   1. When would you like to be told in the study process?
3. As a clinician, do you think you should have a say in how this study is designed and conducted?
4. To what extent would you like to be involved (or not) in helping design it?
5. Why or why not?
6. Are there specific ways you think institutions should engage clinicians?
   1. Can you give me a couple examples (emails, letters, web sites, surveys, panels, etc.)?

*CLOSING*

If not already covered:

1. Are there any other issues or challenges you could imagine with this study that we did not discuss?

[Note: try to keep comments on study design, etc. to a minimum; “while there are many possible versions of this study, we want to hear your opinion about this *type* of study”]

**CATEGORY 3 – CLINICIAN EDUCATION/SUPPORT [10-12 minutes]**

1. Let’s talk about the category of research in which researchers might:
   1. Compare strategies for educating clinicians about new programs, systems, or research developments
   2. Or study the effectiveness of systems and procedures meant to provide clinician support.
2. Here’s an example. Let’s say researchers are interested in investigating better ways to reduce the number of potential adverse drug interactions.
   1. The study would examine physicians prescribing antibiotics for respiratory infections.
   2. Researchers want to test a computerized pop-up alert system to reduce adverse drug interactions.
   3. If a physician was about to prescribe a new drug which could potentially interact negatively with a drug a patient is already taking, an alert would pop up on the screen reminding the doctor of the negative interaction.
   4. At the time of order entry, individual physicians at an institution would be randomized to receive a simple alert or an alert that requires the physician to document the potential interaction in the patient’s chart.
3. Researchers would compare the rate of adverse drug interactions between physicians who received the simple alert and those who received the alert requiring documentation.
   - - 1. Are you familiar with studies of this sort?

**[If YES]**

1. Please tell me briefly about it.

- 1. Okay, what was your role?

**(If PI/researcher, see appendix at back of guide)**

- 1. How did it go from your point of view?

PROMPTS:

- - 1. How, if at all, did you talk to your patients about this study?
    2. How did they react?
    3. Were you comfortable explaining the study (e.g., that you didn’t know which drug worked best)?
    4. Did this study use a consent process? Can you describe it? How well/not do you think it worked?

**[ALL]**

- - - 1. How do you think this type of study compares to traditional clinical trials?
         1. How do you perceive the risks/burdens to patients?
         2. To physicians?

Probes: liability, time, workflow, consent if physician is being asked to obtain consent for a study they did not design

1. How do you view a study like this in comparison to everyday clinical care?
   1. Risks/burdens to patients
   2. Burdens to physicians
2. What, if any, are the ethical obligations to do this type of research:
   1. Of institutions?
   2. Of clinicians?
   3. Of patients?
   4. PROBES: What would get in the way of meeting that obligation? What are potential competing or overriding factors? How do you think this plays out in practice?

*DOMAIN 1. Clinician – Patient Relationship – Clinician Relationships*

1. How would you say this study compares to your typical procedure for prescribing drugs?

1. Can you describe how this study might or might not affect your relationship with your patients?

PROMPTS:

1. How do you think your patients would respond to this type of study?
2. Can you explain how you might discuss this study with your patients?
3. Would you be comfortable doing so?
4. If not, what would be needed to make you more comfortable?
5. Can you describe how it would look to incorporate this type of study into your workflow?

PROMPTS:

1. What barriers do you imagine?
2. How might they be overcome?

2. As a clinician, would this type of study raise ethical challenges for you? [In comparison to clinical care]

1. What role, if any, should consent play in this scenario? Do you think this type of study requires consent from patients?
   1. If so:
      1. Why is it important to get consent?
      2. How should it be obtained?
      3. Why this method?
      4. Specifically probe: why or why not *written consent*?
   2. If not:
      1. Why not?
      2. Are there other similar types of studies which you think might require consent? (i.e. a more serious intervention?)
      3. Specifically probe: what about *written consent*?
   3. How do you view the role of informed consent in a study like this in comparison to a traditional clinical trial?
2. Do you think this type of study requires consent from providers?
   1. If so:
      1. Why is it important to get consent?
      2. How should it be obtained?
      3. Why this method?
      4. Specifically probe: why or why not *written consent*?
   2. If not:
      1. Why not?
      2. Are there other similar types of studies which you think might require consent? (i.e. a more time intensive intervention, such as sending physicians to continuing education seminars?)
      3. Specifically probe: what about *written consent*?
   3. How do you view the role of informed consent in a study like this in comparison to a traditional clinical trial?

*DOMAIN 2. Clinicians and their Institution*

- - - 1. Imagine your department chair or a similar leader wants your department to take part in this study. You and the other physicians in your department will be *expected* to enroll and will be randomized to receive either the simple alert or the alert requiring documentation.

1. How do you think this might work at your institution?
2. When would you like to be involved in the study process?
   1. PROBES: During the design process? Right before implementation? After it’s over (sharing results?)
3. Are there specific ways you think institutions should engage clinicians?
   1. Can you give me a couple examples (emails, letters, web sites, surveys, panels, etc.)?
      - 1. Now imagine that your department chair or a similar leader wants your department to take part in this study and is asking individual clinicians if they *want* to join. If they approached you, would you want to participate?
           1. Why or why not?
           2. Would you feel like you had to participate?
           3. As a clinician, do you think you should have a say in how this study is designed and conducted?
4. To what extent would you like to be involved (or not) in helping design it?
5. Why or why not?
   - - - 1. When would you like to be told in the study process?
         2. Are there specific ways institutions should engage clinicians?

Can you give me a couple examples (emails, letters, web sites, surveys, panels, etc.)?

*CLOSING*

If not already covered:

1. Are there any other issues or challenges you could imagine with this study that we did not discuss?

[Note: try to keep comments on study design, etc. to a minimum; “while there are many possible versions of this study, we want to hear your opinion about this *type* of study”]

**OTHER ISSUES [3-5 minutes]**

Is there anything else you think I should know about the ethical, regulatory, and logistical issues related to research that is conducted in the context of usual health care practices/encounters?

**[STOP RECORDING]**

**CONCLUSION**

Thank you so much for your help. I appreciate your taking the time to speak with me. Your input will be very helpful to us as we study these issues. Thanks again!

REMIND INTERVIEWEE TO COMPLETE FORMS TO RECEIVE THEIR $100

**APPENDIX FOR PI/RESEARCHERS**

**The following questions apply only if the interviewee is a PI, which should be rare:**

1. As a PI in this kind of study, would you see a lot of regulatory challenges?
   1. Was there a lot of back and forth with the IRB? Other agencies or committees?
2. Any other challenges?
3. How did other clinicians react to the study?
   1. What, if any, authorization or consent model did you use? How did clinicians react?
   2. Probes: how did they react to their role as participants?
   3. Were they comfortable explaining to patients that they didn’t know which arm was better?
   4. Did they express any concerns (e.g., about being forced into it, time pressures, resource limitations)?
4. Do you think practicing clinicians should have a say in the design of these studies?
5. How did patients react?
   1. What, if any authorization or consent model did you use? How did patients react?
6. Other thoughts or concerns?

**Continue with domain questions**

**Supplementary table 1: Major Themes and Illustrative Quotes**

| **Theme** | **Illustrative Quote** |
| --- | --- |
| **Familiarity and Research Experience** | I know about this study [hand gel study], and this type of study, but I’m not…I haven’t…I’ve never been involved in this kind of study. (Hospitalist, Female, Integrated, For-profit) |
| **Notification and Consent** |  |
| Uncertainty regarding notification and consent | So in a traditional clinical trial you have to have informed consent. This kind of trial, actually, I don't know that you need the individual patient's consent since it's going to be … it's randomized by doctor. I don't know … I don't know if you put a sign up … I don't know. That's a hard one for me to think about. I don't know how … I think that our system based practice changes that occur, our patients are completely unaware of those. So I don't know that that's necessarily right though. (Outpatient, Female, Non-integrated, Not-for-profit) |
| **Risks/Concerns** |  |
| To clinicians (general) | I think people would have logistical concerns about what does that mean that I would be expected to enroll all patients in the study? What does my workflow look like? How knowledgeable do I have to be about this? How much time do I have to spend explaining it to the patient? So I think it would be the difference between the theoretically, yes, this sounds to nuts and bolts logistics of how this … it actually happens. (Outpatient, Female, Integrated, Not-for-profit) |
| Workflow | Depends. Depends on if the physician … is there a research nurse who's going to consent, etc., or is the individual clinician going to consent the patients? So if there's no research nurse and then the physician is the one who's going to be involved in obtaining consent, etc., then it's going to impact significantly the physician's workflow. (Outpatient, Male, Non-integrated, Not-for-profit) |
| Time | Well the biggest barrier … the overall biggest barrier would be time. So if it took more time to treat the patient under the protocol then that's the biggest barrier because obviously everyone's generally moving pretty fast taking care of patients. (Hospitalist, Male, Integrated, Not-for-profit) |
| To patients | I think usually what I think of comparative effectiveness, and as you said, if you've got two sort of well-known and kind of equally approved methods that haven't been directly compared, then risks I think to the patients are less because there's not as much of an unknown in terms of what you're actually accomplishing with those therapies. (Hospitalist, Male, Non-integrated, For-profit) |
| Ethical concerns | … I think that our system-based practice changes that occur, our patients are completely unaware of those. So I don't know that that's necessarily right though. (Outpatient, Female, Non-integrated, Not-for-profit) |
| Loss of clinician autonomy | Well the physicians might feel frustrated about not being able to choose which anticoagulant they use for … they can choose for their patients, depending on the clinical context. On the other hand, at least at one of our hospitals, I know that we don't have much flexibility on which anticoagulant we choose anyway. So even if we wanted to choose the one that we would prefer to do, currently, that's not an option . . . So that might just be … I think it just depends on what the options are at the different institutions studied. (Outpatient, Female, Non-integrated, For-profit) |
| **Study benefits** |  |
| To clinicians | I think this is extremely useful because if it can help me figure out what might be a better choice going forward for treatment of a particular patients, I'm all for it. (Outpatient, Male, Integrated, For-profit) |
| To patients | Because I think this type of study overall it would definitely help decreasing the potential risk to the patient. I think it's something that would be a benefit for me to participate in. I want to be, like the main reason of the study is just overall patient care and I think that would be definitely beneficial for the patient care. (Hospitalist, Male, Non-integrated, Not-for-profit) |
| Broad/general benefits | Yeah, I think we as physicians should always be, again, seeking to expand our knowledge base and improve upon our methods. And if we did not do that we would probably still be doing a lot of things that have been proven to be harmful over the previous decades. And so it's always … question in a rational way that makes sense I think is part of being a physician. (Hospitalist, Male, Non-integrated, For-profit) |
| **Study comparisons** |  |
| Comparisons to clinical trials | I would see the risks as less than in a typical clinical trial, mostly because I often think of in a clinical trial sort of getting a treatment versus not getting a treatment and there's potential harms and benefits to both of that, depending on what we end up finding out about the treatment. Here we already know you're going to get one of two already proven helpful treatments, hopefully, from what we understand. And so though one might be a little bit better than the other, you're being treated more close to equally. So I consider it kind of a lower risk study in general. (Outpatient, Female, Integrated, Not-for-profit) |
| Comparisons to clinical care/usual practice | I guess the best way I'd describe it is it's tinkering with everyday clinical care, right? And it's sort of an informed tinkering. So lots of times when we tinker with things we don't actually know what we're doing; we just do it. And so this is ... I would just call it informed tinkering. (Outpatient, Male, Integrated, Not-for-profit) |
| Comparisons between studies | Yeah, well I think … with these kinds of trials where there's more I guess direct patient involvement, the burden for informed consent is much higher and subsequently the physicians that are participating in the study are going to have to spend a concordant amount of time describing that … making sure the patient is informed and describing the … and sort of the reasons behind the study and explaining that all the … both therapies are effective in their own right, we don't know which one is better than the other. And in this particular case I think it's a lot harder to institute this on an institutional level, just across the board, and get everybody to participate, like you are with the hand gel experiment because, again, you're asking for more than just somebody's pumping outside of the door. You're asking for a lot more of their time and effort to try and be involved. So this I think there's a significantly greater burden on the physician participants. (Hospitalist, Male, Non-integrated, For-profit) |
| **Reasons for or against notification/consent** |  |
| Perceived risk | The risk to the patient I would think would be much less. So really, the issue in informed consent is it would be that they could end up getting an inferior drug and they should know that. Now of course the flip side I guess is, if they don't participate in the study they could still be getting an inferior drug. [Laughter] So I guess it's less critical in nature than for something that's still in clinical trials and hasn't been marketed yet. But I guess the other piece of that is that they could also end up getting a drug that I was less familiar with. So it's hard to know how much of an impact that would be on their clinical care. Probably not a lot, but that is a potential issue. (Hospitalist, Male, Integrated, Not-for-profit) |
| Proximity to patients | It's just because of the … as I said the previous regulatory, I'm still there, but ethically I don't feel that they need a formal consent for this. Again, they need to be informed that this is going to happen to them because they don't have … I don't think that they have that direct … they will not have that direct effect on the change of the work flow. So that's why I don't think they would need to be consented for that. Now the provider on the other hand is different because they're the ones that are being directly affected by the new work flow. (Hospitalist, Male, Integrated, Not-for-profit) |
| Proximity to clinicians | . . . this is something they may not necessarily want to do, right? So that's why I think it's important that they are consented because they're, obviously going to be studied … they're almost the subject. (Outpatient, Female, Non-integrated, Not-for-profit) |
| Regulatory requirement | So again, this is more of a technical technicality I believe rather than ethically, particularly if the intended effect is pretty minor. But as of the current state where I'm working or … I know that anything that's labeled as research needs to be … needs to have some form of consent, written … most often written. (Hospitalist, Male, Integrated, Not-for-profit) |
| Ethical requirement | Yeah, to me that strikes me as a little bit more black and white. That strikes me as a, like, no, I would not ethically feel the need. Now I'm not the IRB, but if I was, I wouldn't think that that needs any kind of approval from patients, mostly because there is no defined increased risk with one or the other, asking to randomize patients to one or the other is going to be standard of care. (Hospitalist, Female, Non-integrated, For-profit) |
| Personal opinion | My gut reaction is yes. I think … I mean if both of them are approved … [Pause] yeah, I think so. (Outpatient, Female, Non-integrated, For-profit) |
| Role of randomization | Well that's, again, it's not … it is a … it's research so you're asking the patient to agree to be treated with a medicine that isn't necessarily the first choice the physician might otherwise have. And it's just random. It's you're tossing a coin, I think that they need to know that it's, it’s okay, we don't know which side of the coin is better, but we are tossing a coin. (Outpatient, Male, Integrated, Not-for-profit) |
| Feasibility | Well that's, again, it's not … it is a … it's research so you're asking the patient to agree to be treated with a medicine that isn't necessarily the first choice the physician might otherwise have. And it's just random. It's you're tossing a coin, I think that they need to know that it's, it’s okay, we don't know which side of the coin is better, but we are tossing a coin. (Outpatient, Male, Non-integrated, Not-for-profit) |
| Burdens | So I'm not sold that it would necessarily require consent, because I think it could just be time-consuming. (Outpatient, Female, Non-integrated, Not-for-profit) |
| **Physician engagement in research** |  |
| Role of clinician in research | I think if I was leading the work I'd want to be involved at the time of the design as kind of a consultant. I think as a practicing clinician who is just a participant in this study it's always good to give people sort of a heads-up, like, hey, this is something we're looking at, and perhaps give a little bit of time for feedback and collaboration in terms of the design before you actually implement. (Outpatient, Female, Integrated, Not-for-profit) |
| Clinician engagement/input | If you don't get the physicians' buy-in prior to enrolling in a study, this is resented. There's very independent type A thinkers and we actually can have them use like protocols so that we can show outcomes of patients safety that are improved, or benefits. So in something that is research I think that you have to have buy-in from the physicians. And you want buy-in because you want them to do things accurately and do things the right way and not just do it because they have to. (Outpatient, Female, Non-integrated, Not-for-profit) |
| Study design/integrity | I would just be willing to see how the study is designed and then I would be definitely happy to participate in it if I like how it's designed or if I agree how it's designed, yeah. (Hospitalist, Male, Non-integrated, Not-for-profit) |
| Transparency | Oh, I believe patients should always be involved in the research. I mean I believe in transparency. If things pop up, we're encouraged to share their medical record with them or we're encouraged to share what we're doing and if it's a pop-up window, that'd be easy to explain. I don't see any detriment to sharing that, sharing it with the patient. (Outpatient, Male, Integrated, Not-for-profit) |
